# Supplementary material for: Understanding public trust in services provided by community pharmacists relative to those provided by general practitioners: a qualitative study
Source: PubMed Central journal article supplement — BMJ Open. 2012 May 14;2(3):e000939. doi: 10.1136/bmjopen-2012-000939 (PMC3358628; doi:10.1136/bmjopen-2012-000939), 2012-05-14
Supplement: bmjopen-2012-000939-s1.pdf [file bmjopen-2012-000939-s1.pdf]

**Table 1: Details of focus groups**

|                        | Focus groups |        |        |        |         | Total   |
|------------------------|--------------|--------|--------|--------|---------|---------|
|                        | 1            | 2      | 3      | 4      | 5       |         |
| Number of participants | 6            | 7      | 4      | 4      | 5       | 26      |
| Gender (M:F)           | 0:6          | 4:3    | 0:4    | 0:4    | 5:0     | 9:14    |
| Age (mean)             | 73.67        | 62.57  | 27.00  | 29.75  | 47.40   | 51.69   |
| (SD)                   | (14.51)      | (9.03) | (6.98) | (7.27) | (17.07) | (21.16) |
| Range                  | 58-94        | 52-77  | 18-35  | 23-40  | 21-63   | 18-94   |
