# Supplementary material for: Understanding public trust in services provided by community pharmacists relative to those provided by general practitioners: a qualitative study
Source: PubMed Central journal article supplement — BMJ Open. 2012 May 14;2(3):e000939. doi: 10.1136/bmjopen-2012-000939 (PMC3358628; doi:10.1136/bmjopen-2012-000939), 2012-05-14
Supplement: bmjopen-2012-000939-s2.pdf [file bmjopen-2012-000939-s2.pdf]

**Table 2: Details of focus group participants**

| <b>Respondent</b> | <b>Age</b> | <b>Sex</b> | <b>Group</b> | <b>Group description</b> |
|-------------------|------------|------------|--------------|--------------------------|
| 1                 | 58         | F          | 1            | Seniors 1                |
| 2                 | 76         | F          | 1            | Seniors 1                |
| 3                 | 87         | F          | 1            | Seniors 1                |
| 4                 | 62         | F          | 1            | Seniors 1                |
| 5                 | 65         | F          | 1            | Seniors 1                |
| 6                 | 94         | F          | 1            | Seniors 1                |
| 7                 | 68         | F          | 2            | Seniors 2                |
| 8                 | 65         | M          | 2            | Seniors 2                |
| 9                 | 77         | M          | 2            | Seniors 2                |
| 10                | 66         | F          | 2            | Seniors 2                |
| 11                | 53         | F          | 2            | Seniors 2                |
| 12                | 52         | M          | 2            | Seniors 2                |
| 13                | 57         | M          | 2            | Seniors 2                |
| 14                | 28         | F          | 3            | Mothers 1                |
| 15                | 27         | F          | 3            | Mothers 1                |
| 16                | 35         | F          | 3            | Mothers 1                |
| 17                | 18         | F          | 3            | Mothers 1                |
| 18                | 27         | F          | 4            | Mothers 2                |
| 19                | 29         | F          | 4            | Mothers 2                |
| 20                | 40         | F          | 4            | Mothers 2                |
| 21                | 23         | F          | 4            | Mothers 2                |
| 22                | 62         | M          | 5            | Male group               |
| 23                | 63         | M          | 5            | Male group               |
| 24                | 21         | M          | 5            | Male group               |
| 25                | 47         | M          | 5            | Male group               |
| 26                | 44         | M          | 5            | Male group               |
