# Supplementary material for: Understanding public trust in services provided by community pharmacists relative to those provided by general practitioners: a qualitative study
Source: PubMed Central journal article supplement — BMJ Open. 2012 May 14;2(3):e000939. doi: 10.1136/bmjopen-2012-000939 (PMC3358628; doi:10.1136/bmjopen-2012-000939), 2012-05-14
Supplement: bmjopen-2012-000939-s3.pdf [file bmjopen-2012-000939-s3.pdf]

**Consolidated criteria for reporting qualitative studies (COREQ):  
32-item checklist**  
**Barriers to medicine use in secondary schools: a qualitative  
study**

Developed from:

Tong A, Sainsbury P, Craig J. Consolidated criteria for reporting qualitative research (COREQ): a 32-item checklist for interviews and focus groups. *International Journal for Quality in Health Care*. 2007. Volume 19, Number 6: pp. 349 – 357

**YOU MUST PROVIDE A RESPONSE FOR ALL ITEMS. ENTER N/A IF NOT APPLICABLE**

| No. Item                                       | Guide questions/description                                                                              | Reported on Page #                                                                                                                                                                                                                                                     |
|------------------------------------------------|----------------------------------------------------------------------------------------------------------|------------------------------------------------------------------------------------------------------------------------------------------------------------------------------------------------------------------------------------------------------------------------|
| <b>Domain 1: Research team and reflexivity</b> |                                                                                                          |                                                                                                                                                                                                                                                                        |
| <i>Personal Characteristics</i>                |                                                                                                          |                                                                                                                                                                                                                                                                        |
| 1. Inter viewer/facilitator                    | Which author/s conducted the inter view or focus group?                                                  | Joseph Cowley was the facilitator – he is not an author as he did not contribute to the paper.                                                                                                                                                                         |
| 2. Credentials                                 | What were the researcher’s credentials?<br>E.g. PhD, MD                                                  | BSc, MSc                                                                                                                                                                                                                                                               |
| 3. Occupation                                  | What was their occupation at the time of the study?                                                      | Research associate/PhD student                                                                                                                                                                                                                                         |
| 4. Gender                                      | Was the researcher male or female?                                                                       | Male                                                                                                                                                                                                                                                                   |
| 5. Experience and training                     | What experience or training did the researcher have?                                                     | The researcher gathered data in a focus group study at Strathclyde University prior to this study in 2009. He had an MSc. He had also collected data on community based health research projects from 2001 to 2006 including the NHS Lanarkshire “Braveheart” Project” |
| <i>Relationship with participants</i>          |                                                                                                          |                                                                                                                                                                                                                                                                        |
| 6. Relationship established                    | Was a relationship established prior to study commencement?                                              | No                                                                                                                                                                                                                                                                     |
| 7. Participant knowledge of the interviewer    | What did the participants know about the researcher? e.g. personal goals, reasons for doing the research | Participants knew that the researcher worked at the University of Strathclyde in the                                                                                                                                                                                   |

|                                          |                                                                                                                                                          |                                                                                                                                                                                                                        |
|------------------------------------------|----------------------------------------------------------------------------------------------------------------------------------------------------------|------------------------------------------------------------------------------------------------------------------------------------------------------------------------------------------------------------------------|
|                                          |                                                                                                                                                          | Pharmacy Department.                                                                                                                                                                                                   |
| 8. Interviewer characteristics           | What characteristics were reported about the interviewer/facilitator? e.g. Bias, assumptions, reasons and interests in the research topic                | Participants know the researcher worked in a Pharmacy Department.                                                                                                                                                      |
| <b>Domain 2: study design</b>            |                                                                                                                                                          |                                                                                                                                                                                                                        |
| <i>Theoretical framework</i>             |                                                                                                                                                          |                                                                                                                                                                                                                        |
| 9. Methodological orientation and Theory | What methodological orientation was stated to underpin the study? e.g. grounded theory, discourse analysis, ethnography, phenomenology, content analysis | Inductive thematic analysis.                                                                                                                                                                                           |
| <i>Participant selection</i>             |                                                                                                                                                          |                                                                                                                                                                                                                        |
| 10. Sampling                             | How were participants selected? e.g. purposive, convenience, consecutive, snowball                                                                       | Purposive/convenience – typical users and non users of pharmacy services were selected on the basis of demographic characteristics i.e. mothers with young children (from the UK and immigrants) men and older people. |
| 11. Method of approach                   | How were participants approached? e.g. face-to-face, telephone, mail, email                                                                              | Participants were recruited through non-pharmacy or national health related voluntary and charity organisations.                                                                                                       |
| 12. Sample size                          | How many participants were in the study?                                                                                                                 | 26                                                                                                                                                                                                                     |
| 13. Non-participation                    | How many people refused to participate or dropped out? Reasons?                                                                                          | Not applicable – participation was voluntary.                                                                                                                                                                          |
| <i>Setting</i>                           |                                                                                                                                                          |                                                                                                                                                                                                                        |
| 14. Setting of data collection           | Where was the data collected? e.g. home, clinic, workplace                                                                                               | Localities that were convenient to participants in their community for example in a community hall                                                                                                                     |
| 15. Presence of non-participants         | Was anyone else present besides the participants and researchers?                                                                                        | No.                                                                                                                                                                                                                    |
| 16. Description of sample                | What are the important characteristics of the sample? e.g. demographic data, date                                                                        | Gender, age and parental status.                                                                                                                                                                                       |
| <i>Data collection</i>                   |                                                                                                                                                          |                                                                                                                                                                                                                        |
| 17. Interview guide                      | Were questions, prompts, guides provided by the authors? Was it pilot tested?                                                                            | A topic guide was devised by the research team and                                                                                                                                                                     |

|                                        |                                                                                                                                 |                                                                                                                                               |
|----------------------------------------|---------------------------------------------------------------------------------------------------------------------------------|-----------------------------------------------------------------------------------------------------------------------------------------------|
|                                        |                                                                                                                                 | initial interviews acted as a pilot.                                                                                                          |
| 18. Repeat interviews                  | Were repeat inter views carried out? If yes, how many?                                                                          | No.                                                                                                                                           |
| 19. Audio/visual recording             | Did the research use audio or visual recording to collect the data?                                                             | Data were audio recorded using a digital recorder.                                                                                            |
| 20. Field notes                        | Were field notes made during and/or after the inter view or focus group?                                                        | Yes.                                                                                                                                          |
| 21. Duration                           | What was the duration of the inter views or focus group?                                                                        | On average 53 minutes.                                                                                                                        |
| 22. Data saturation                    | Was data saturation discussed?                                                                                                  | Yes                                                                                                                                           |
| 23. Transcripts returned               | Were transcripts returned to participants for comment and/or correction?                                                        | No                                                                                                                                            |
| <b>Domain 3: analysis and findings</b> |                                                                                                                                 |                                                                                                                                               |
| <i>Data analysis</i>                   |                                                                                                                                 |                                                                                                                                               |
| 24. Number of data coders              | How many data coders coded the data?                                                                                            | 3<br>Lesley MacGregor,<br>Wendy Gidman.                                                                                                       |
| 25. Description of the coding tree     | Did authors provide a description of the coding tree?                                                                           | Not explicitly.                                                                                                                               |
| 26. Derivation of themes               | Were themes identified in advance or derived from the data?                                                                     | This was an exploratory study. Analysis was inductive themes were derived from the data.                                                      |
| 27. Software                           | What software, if applicable, was used to manage the data?                                                                      | Data were transcribed verbatim into word documents by professional transcribers. Themes were groups by cutting and pasting between documents. |
| 28. Participant checking               | Did participants provide feedback on the findings?                                                                              | No                                                                                                                                            |
| <i>Reporting</i>                       |                                                                                                                                 |                                                                                                                                               |
| 29. Quotations presented               | Were participant quotations presented to illustrate the themes/findings? Was each quotation identified? e.g. participant number | Yes, identified by participant number                                                                                                         |
| 30. Data and findings consistent       | Was there consistency between the data presented and the findings?                                                              | Yes                                                                                                                                           |
| 31. Clarity of major themes            | Were major themes clearly presented in the findings?                                                                            | Yes                                                                                                                                           |
| 32. Clarity of minor themes            | Is there a description of diverse cases or discussion of minor themes?                                                          | Yes – word count restrictions did not permit more extensive theme discussion.                                                                 |

**Once you have completed this checklist, please save a copy and upload it as part of your submission. When requested to do so as part of the upload process, please select the file type: *Checklist*. You will NOT be able to proceed with submission unless the checklist has been uploaded. Please DO NOT include this checklist as part of the main manuscript document. It must be uploaded as a separate file.**
